# Supplementary material for: Responsive carbon dot-embedded hybrid microgels for dual sensing of iron(iii) and ciprofloxacin
Source: Royal Society of Chemistry journal article supplement (doi:10.1039/d5tb00315f), 2025-01-01
Supplement: d5tb00315f1.pdf [file d5tb00315f1.pdf]

Supplementary data

**Responsive Carbon Dots embedded Hybrid Microgels for  
dual sensing of Iron (III) and Ciprofloxacin**

Neha Garg<sup>a</sup>, Armaandeep Kaur<sup>a</sup>, Savita Chaudhary<sup>a,\*</sup>, Abhijit Dan<sup>\*b</sup>

<sup>a</sup>Department of Chemistry and Centre of Advanced Studies in Chemistry, Panjab University, Chandigarh 160014, India

<sup>b</sup>Department of Applied Chemistry, Maulana Abul Kalam Azad University of Technology, Simhat, Haringhata, West Bengal 741249, India

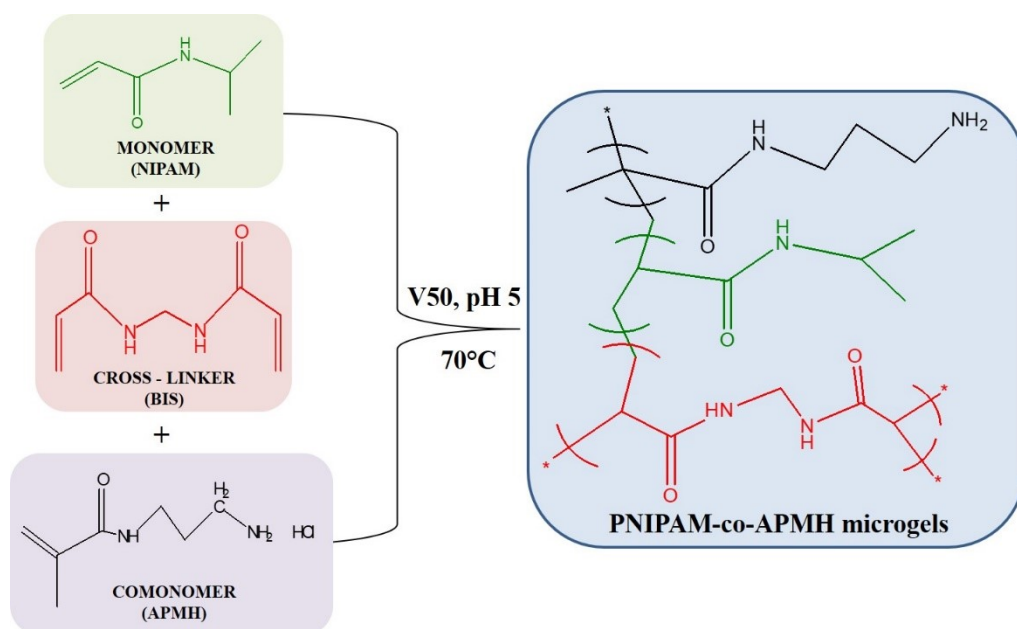

**Fig S1.** Polymerization scheme for the synthesis of PNIPAM-co-APMH microgels.

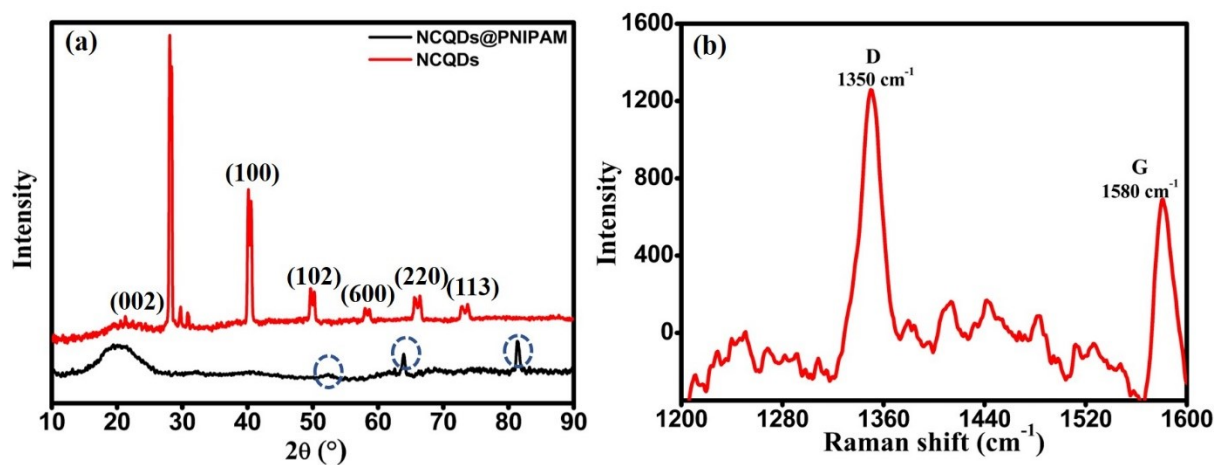

**Fig S2.** (a) XRD pattern for NCQDs and NCQDs@PNIPAM-co-APMH and (b) Raman spectra for NCQDs.

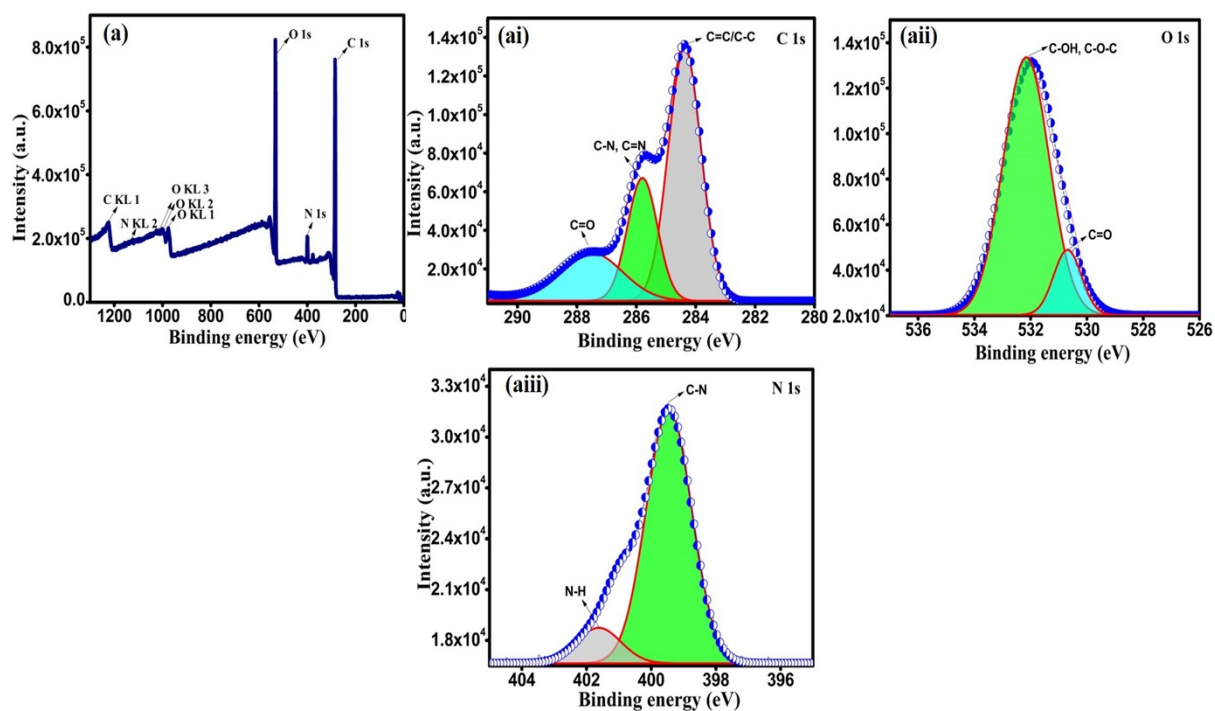

**Fig S3.** (a) XPS wide scan and (ai-aiii) high-resolution XPS spectra of  $\text{C}_{1s}$ ,  $\text{O}_{1s}$  and  $\text{N}_{1s}$  for NCQDs.

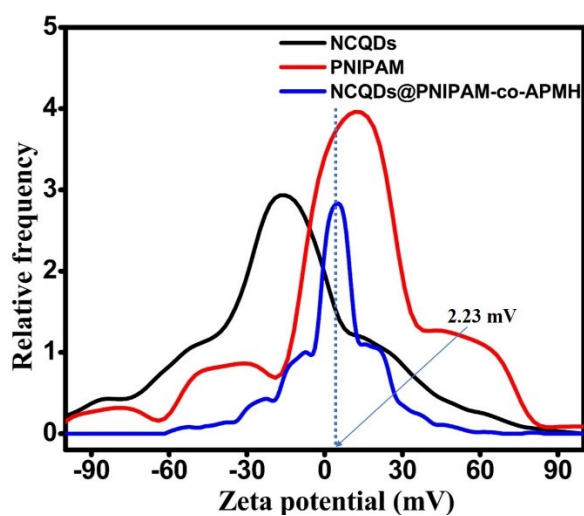

**Fig S4.** Zeta potential curves for pure NCQDs, pure PNIPAM and NCQDs@PNIPAM-co-APMH.

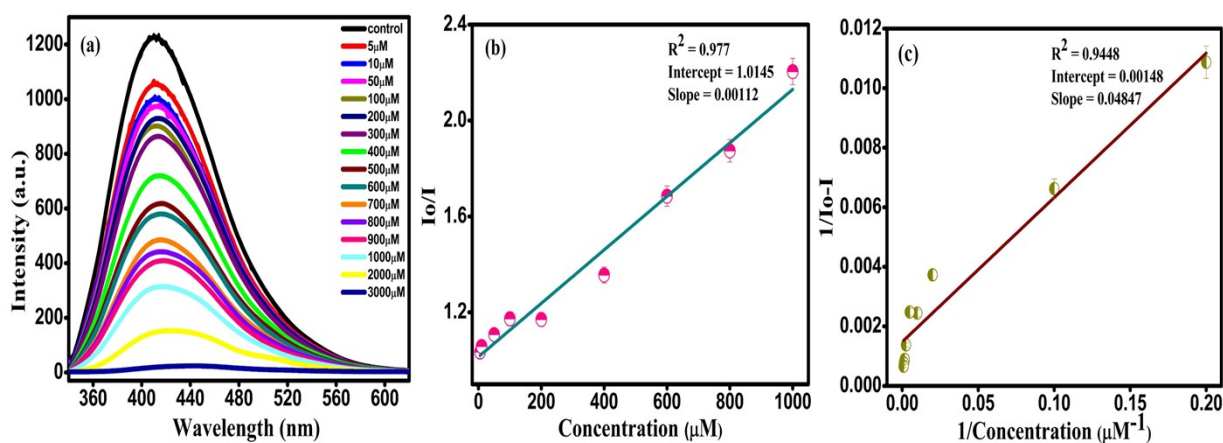

**Fig S5.** (a) Concentration dependent emission spectra of NCQDs in presence of  $\text{Fe}^{3+}$  ions, (b) stern-volmer plot and (c) Benesi-Hilderbrand plot for NCQDs.

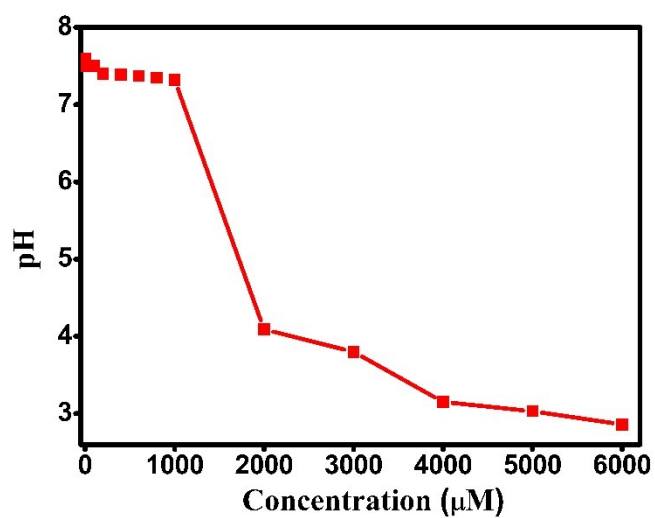

**Fig S6.** Graph showing pH variation study with the concentration of  $\text{Fe}^{3+}$  ions.

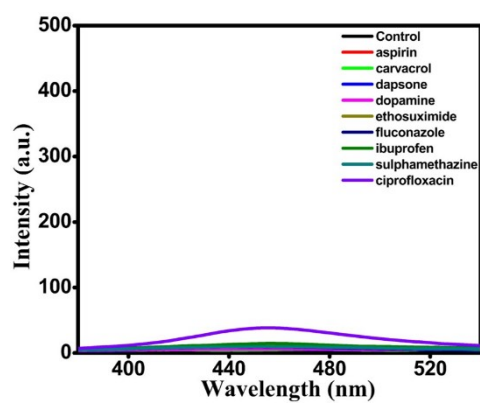

**Fig S7.** The emission spectra of NCQDs- $\text{Fe}^{3+}$  complex in presence of different drugs.

**Table S1.** Detection of CIP using previously available fluorescent sensors.

| S. No. | Material used as sensor                                                 | LOD ( $\mu\text{M}$ ) | Reference |
|--------|-------------------------------------------------------------------------|-----------------------|-----------|
| 1.     | Cd-Se carbon dots                                                       | 0.60                  | [1]       |
| 2.     | Carbon dots from tejapata leaves                                        | 6.06                  | [2]       |
| 3.     | MIN-s@PEGDA                                                             | 6.86                  | [3]       |
| 4.     | Citrate functionalized Zr-MOF                                           | 9.40                  | [4]       |
| 5.     | Cd-Te quantum dots modified with glutathione and mercaptopropionic acid | 0.90                  | [5]       |
| 6.     | NCQDs@PNIPAM-co-APMH                                                    | 0.41                  | This work |

**References:**

1. H. Xia, M. Peng, N. Li and L. Liu, CdSe quantum dots-sensitized FRET system for ciprofloxacin detection, *Chem. Phys. Lett.*, 2020, **740**, 137085.
2. N. Chaudhary, D. Verma, J.G. Sharma and P.R. Solanki, A novel bioinspired carbon quantum dots based optical sensor for ciprofloxacin detection, *Mater. Lett.*, 2022, **308**, 131090.
3. Q.D. Huang, C.H. Lv, X.L. Yuan, M. He, J.P. Lai and H. Sun, A novel fluorescent optical fiber sensor for highly selective detection of antibiotic ciprofloxacin based on replaceable molecularly imprinted nanoparticles composite hydrogel detector, *Sens. Actuators B: Chem.*, 2021, **328**, 129000.
4. B.T. Liu, D. Nagarajan, S. Kaliyamoorthy and B. Rathinam, Citrate functionalized zirconium-based metal organic framework for the fluorescent detection of ciprofloxacin in aqueous media, *Micromachines*, 2022, **13**, 2097.
5. X.L. Yuan, X.Y. Wu, M. He, J.P. Lai and H. Sun, A ratiometric fiber optic sensor based on CdTe QDs functionalized with glutathione and mercaptopropionic acid for on-site monitoring of antibiotic ciprofloxacin in aquaculture water, *Nanomater.*, 2022, **12**, 829.

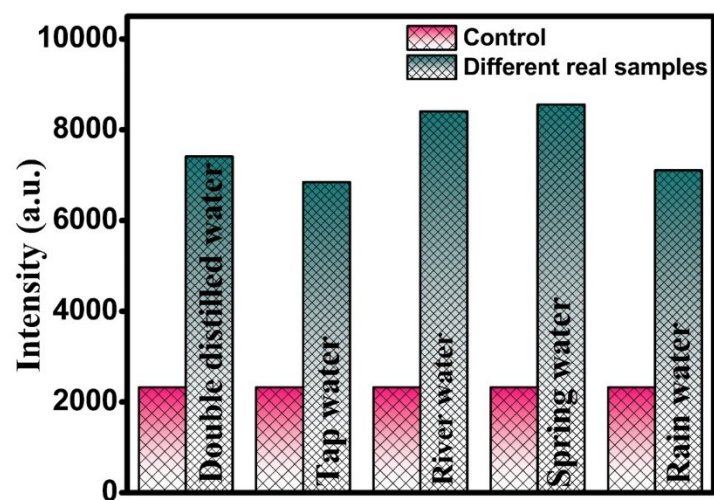

**Fig S8.** Analysis of CIP using NCQDs@PNIPAM-co-APMH -Fe<sup>3+</sup> in real water samples.
